# Supplementary material
Source: PubMed Central journal article supplement (PMC8321431)

# THE LANCET

## Supplementary appendix

This appendix formed part of the original submission and has been peer reviewed.  
We post it as supplied by the authors.

Supplement to: Katsoularis I, Fonseca-Rodríguez O, Farrington P, Lindmark K, Fors Connolly A-M. Risk of acute myocardial infarction and ischaemic stroke following COVID-19 in Sweden: a self-controlled case series and matched cohort study. *Lancet* 2021; published online July 29. [http://dx.doi.org/10.1016/S0140-6736\(21\)00896-5](http://dx.doi.org/10.1016/S0140-6736(21)00896-5).

Supplementary Table 1. Intervention codes used to specify the date of AMI if the date of hospitalization and the date of intervention differed by more than 3 days.

| <b>OP-Code</b>    | <b>Description</b>                                                                                                                                                                                                                                                                                                                                                                        |
|-------------------|-------------------------------------------------------------------------------------------------------------------------------------------------------------------------------------------------------------------------------------------------------------------------------------------------------------------------------------------------------------------------------------------|
| <b><i>AF</i></b>  | <b><i>Heart and the large intrathoracic vessels, investigation</i></b>                                                                                                                                                                                                                                                                                                                    |
| AF003             | Angiography, left atrium                                                                                                                                                                                                                                                                                                                                                                  |
| AF004             | Angiography, left ventricle                                                                                                                                                                                                                                                                                                                                                               |
| AF006             | Angiography, coronary bypass incl. a. mammaria interna                                                                                                                                                                                                                                                                                                                                    |
| AF034             | Intravascular ultrasound (performed during coronary angio)                                                                                                                                                                                                                                                                                                                                |
| AF037             | Coronary angiography                                                                                                                                                                                                                                                                                                                                                                      |
|                   |                                                                                                                                                                                                                                                                                                                                                                                           |
| <b><i>FNA</i></b> | <b><i>Connection to coronary artery from internal mammary artery</i></b>                                                                                                                                                                                                                                                                                                                  |
| FNA00             | Anastomosis to coronary artery from internal mammary artery                                                                                                                                                                                                                                                                                                                               |
| FNA10             | Sequential anastomoses to coronary arteries from internal mammary arteries                                                                                                                                                                                                                                                                                                                |
| FNA20             | Anastomosis to coronary arteries from bilateral internal mammary arteries                                                                                                                                                                                                                                                                                                                 |
| FNA96             | Other connection to coronary artery from internal mammary artery                                                                                                                                                                                                                                                                                                                          |
|                   |                                                                                                                                                                                                                                                                                                                                                                                           |
| <b><i>FNB</i></b> | <b><i>Connection to coronary artery from gastroepiploic artery</i></b>                                                                                                                                                                                                                                                                                                                    |
| FNB00             | Anastomosis to coronary artery from gastroepiploic artery                                                                                                                                                                                                                                                                                                                                 |
| FNB20             | Sequential anastomoses to coronary arteries from gastroepiploic arteries                                                                                                                                                                                                                                                                                                                  |
| FNB96             | Other connection of gastroepiploic artery to coronary artery                                                                                                                                                                                                                                                                                                                              |
|                   |                                                                                                                                                                                                                                                                                                                                                                                           |
| <b><i>FNC</i></b> | <b><i>Aorto-coronary venous bypass</i></b>                                                                                                                                                                                                                                                                                                                                                |
| FNC10             | Aorto-coronary venous bypass with single distal anastomosis                                                                                                                                                                                                                                                                                                                               |
| FNC20             | Aorto-coronary venous bypass with two distal anastomosis                                                                                                                                                                                                                                                                                                                                  |
| FNC30             | Aorto-coronary venous bypass with three distal anastomosis                                                                                                                                                                                                                                                                                                                                |
| FNC40             | Aorto-coronary venous bypass with four distal anastomosis                                                                                                                                                                                                                                                                                                                                 |
| FNC50             | Aorto-coronary venous bypass with five distal anastomosis                                                                                                                                                                                                                                                                                                                                 |
| FNC60             | Aorto-coronary venous bypass with six distal anastomosis                                                                                                                                                                                                                                                                                                                                  |
| FNC96             | Other aorto-coronary venous bypass                                                                                                                                                                                                                                                                                                                                                        |
|                   |                                                                                                                                                                                                                                                                                                                                                                                           |
| <b><i>FND</i></b> | <b><i>Aorto-coronary bypass using prosthetic graft</i></b>                                                                                                                                                                                                                                                                                                                                |
| FND10             | Aorto-coronary bypass using single prosthetic graft                                                                                                                                                                                                                                                                                                                                       |
| FND20             | Aorto-coronary bypass using two prosthetic grafts                                                                                                                                                                                                                                                                                                                                         |
| FND96             | Other aorto-coronary bypass using prosthetic graft                                                                                                                                                                                                                                                                                                                                        |
|                   |                                                                                                                                                                                                                                                                                                                                                                                           |
| <b><i>FNE</i></b> | <b><i>Coronary bypass using free arterial graft</i></b>                                                                                                                                                                                                                                                                                                                                   |
| FNE00             | Coronary bypass using free arterial graft of internal mammary artery                                                                                                                                                                                                                                                                                                                      |
| FNE10             | Coronary bypass using free arterial graft of gastroepiploic artery                                                                                                                                                                                                                                                                                                                        |
| FNE20             | Coronary bypass using free graft of radial artery<br><i>Includes: As the only anastomosis or part of composite Y-graft (T-graft), i.e. interposed between the recipient coronary artery and internal mammary or gastroepiploic artery, when one of these arteries is connected directly to another coronary artery. Additional code for the direct arterial connection, see: FNA, FNB</i> |
| FNE96             | Coronary bypass using other free arterial graft                                                                                                                                                                                                                                                                                                                                           |
|                   |                                                                                                                                                                                                                                                                                                                                                                                           |
| <b><i>FNF</i></b> | <b><i>Coronary thrombendarterectomy</i></b>                                                                                                                                                                                                                                                                                                                                               |
| FNF00             | Thrombendarterectomy of right coronary artery                                                                                                                                                                                                                                                                                                                                             |
| FNF10             | Thrombendarterectomy of anterior descending branch                                                                                                                                                                                                                                                                                                                                        |
| FNF20             | Thrombendarterectomy of circumflex branch                                                                                                                                                                                                                                                                                                                                                 |

|            |                                                                                                                                                |
|------------|------------------------------------------------------------------------------------------------------------------------------------------------|
| FNF30      | Thrombendarterectomy of left main coronary artery<br><i>Includes: Use of patch</i>                                                             |
| FNF96      | Other coronary thrombendarterectomy                                                                                                            |
|            |                                                                                                                                                |
| <b>FNG</b> | <b><i>Expansion and recanalization of coronary artery</i></b>                                                                                  |
| FNG00      | Dilatation of coronary artery                                                                                                                  |
| FNG02      | Percutaneous transluminal coronary angioplasty<br><i>Additional code for specification of technique, see: ZFX, ZXC</i>                         |
| FNG05      | Percutaneous transluminal coronary angioplasty with insertion of stent<br><i>Additional code for specification of technique, see: ZFX, ZXC</i> |
| FNG10      | Embolectomy of coronary artery                                                                                                                 |
| FNG20      | Removal of foreign body from coronary artery                                                                                                   |
| FNG22      | Percutaneous transluminal removal of foreign body from coronary artery                                                                         |
| FNG30      | Expansion of coronary artery using patch                                                                                                       |
| FNG96      | Other recanalisation of coronary artery                                                                                                        |
|            |                                                                                                                                                |
| <b>FNH</b> | <b><i>Repair of coronary artery</i></b>                                                                                                        |
| FNH00      | Suture of coronary artery                                                                                                                      |
| FNH10      | Suture of coronary artery                                                                                                                      |
| FNH20      | Repair of coronary artery with bypass                                                                                                          |
| FNH96      | Other repair of coronary artery                                                                                                                |
|            |                                                                                                                                                |
| <b>FNW</b> | <b><i>Other operations on coronary arteries</i></b>                                                                                            |
| FNW98      | Other percutaneous transluminal procedure on coronary arteries                                                                                 |

Supplementary Table 2. Intervention codes used to specify the date of ischemic stroke if the date of hospitalization and the date of intervention differed by more than 3 days.

| <b>OP-Code</b> | <b>Description</b>                                    |
|----------------|-------------------------------------------------------|
|                |                                                       |
| AA004          | Angiography of vertebral artery                       |
| AA005          | Angiography of internal carotid artery                |
| AA006          | Angiography, combination of two or more angiographies |
|                |                                                       |
| AA011          | Computer tomography, brain                            |
| AA012          | CT, with IV contrast                                  |
|                |                                                       |
| AP070          | Ultrasound of arteries, simple (duplex technique)     |
| AP071          | Ultrasound of arteries, extensive (duplex technique)  |
| AP072          | Ultrasound of veins, extensive (duplex technique)     |
| AP073          | Ultrasound of neck blood vessels (duplex technique)   |
|                |                                                       |
| AAL10          | Intracranial endovascular thrombolysis                |
| AAL15          | Intracranial endovascular thrombectomi                |

Supplementary Table 3. Source of COVID-19 date

| Source of COVID-19 date                                         | Frequency (%) |             |
|-----------------------------------------------------------------|---------------|-------------|
|                                                                 | AMI           | Stroke      |
| <i>Self-controlled case series study</i>                        |               |             |
| Date of COVID-19 symptom onset                                  | 73 (39)       | 115 (45)    |
| Date of contact with outpatient clinic or hospitalization       | 66 (36)       | 65 (26)     |
| Sample date                                                     | 47 (25)       | 74 (29)     |
| <i>Matched cohort study</i>                                     |               |             |
| Date of COVID-19 symptom onset                                  | 29 916 (36)   | 29 687 (36) |
| Date of contact with outpatient clinic or hospitalization       | 6 850 (8)     | 6 879 (8)   |
| Sample date                                                     | 44 778 (54)   | 44 561 (53) |
| Date of diagnosis                                               | 212 (0.3)     | 208 (0.3)   |
| Date of report to Public Health Agency of Sweden                | 2151 (3)      | 2160 (3)    |
| Date of death                                                   | 31 (0.04)     | 27 (0.03)   |
| <b>Source of COVID-19 date for day 0 (SCCS and MCS studies)</b> |               |             |
| Date of COVID-19 symptom onset                                  | 1 (3.7)       | 2 (8)       |
| Date of contact with outpatient clinic or hospitalization       | 21 (77.8)     | 19 (76)     |
| Sample date                                                     | 5 (18.5)      | 4 (16)      |

Supplementary Table 4. The number of events per day in the first two-week period following COVID-19 for both the self-controlled case series and the matched cohort study. The events shown are only for COVID-19 cases.

| Days from COVID-19 | Frequency |        |
|--------------------|-----------|--------|
|                    | AMI       | Stroke |
| 0                  | 27        | 25     |
| 1                  | 0         | 4      |
| 2                  | 3         | 1      |
| 3                  | 0         | 3      |
| 4                  | 3         | 2      |
| 5                  | 2         | 2      |
| 6                  | 3         | 1      |
| 7                  | 1         | 3      |
| 8                  | 2         | 5      |
| 9                  | 2         | 3      |
| 10                 | 1         | 0      |
| 11                 | 0         | 1      |
| 12                 | 1         | 1      |
| 13                 | 2         | 1      |
| 14                 | 4         | 3      |

AMI Acute myocardial infarction

Supplementary Table 5. Effect modification of sex and age in the self-controlled case series analysis.

|                 | Event  | Effect modification | test | df | p-value |
|-----------------|--------|---------------------|------|----|---------|
| Excluding day 0 | AMI    | Sex                 | 1.82 | 5  | 0.87    |
|                 |        | Age                 | 6.77 | 5  | 0.24    |
|                 | Stroke | Sex                 | 2.44 | 5  | 0.79    |
|                 |        | Age                 | 4.33 | 5  | 0.5     |
| Including day 0 | AMI    | Sex                 | 0.74 | 5  | 0.98    |
|                 |        | Age                 | 6.48 | 5  | 0.26    |
|                 | Stroke | Sex                 | 6.19 | 5  | 0.29    |
|                 |        | Age                 | 4.47 | 5  | 0.48    |

AMI Acute myocardial infarction; df degrees of freedom

Supplementary Table 6. Unadjusted and adjusted conditional logistic regression models. Acute Myocardial Infarction (AMI) within 14 days following COVID-19 onset. A matched cohort study. Day 0 is included in the study period.

| Variable                  | Categories    | AMI                |                | Univariable models                        | Multivariable model                       |
|---------------------------|---------------|--------------------|----------------|-------------------------------------------|-------------------------------------------|
|                           |               | No<br>(n=424293)   | Yes<br>(n=77)  | OR (95% CI)                               | OR (95% CI)                               |
| <b>COVID-19 diagnosis</b> | No (%)        | 340,406<br>(99.99) | 26<br>(0.01)   | Ref.                                      | Ref.                                      |
|                           | Yes (%)       | 83,887<br>(99.94)  | 51<br>(0.06)   | <b>8.34 (5.09 - 13.6),<br/>p&lt;0.001</b> | <b>6.61 (3.56 - 12.2),<br/>p&lt;0.001</b> |
| <b>WCCI</b>               | mean (SD)     | 1.06 (2.07)        | 3.81<br>(2.62) | <b>1.31 (1.18 - 1.45),<br/>p&lt;0.001</b> | <b>1.38 (1.18 - 1.62),<br/>p&lt;0.001</b> |
| <b>Income (Quintiles)</b> | Richest (%)   | 82,969<br>(99.99)  | 10<br>(0.01)   | Ref.                                      | Ref.                                      |
|                           | Rich (%)      | 83,049<br>(99.99)  | 9 (0.01)       | 1.29 (0.49 - 3.44,<br>p=0.61)             | 1.39 (0.39 - 4.88,<br>p=0.61)             |
|                           | Middle (%)    | 82,605<br>(99.98)  | 13<br>(0.02)   | 1.51 (0.57 - 4),<br>p=0.41)               | 1.54 (0.42 - 5.61,<br>p=0.51)             |
|                           | Poor (%)      | 80,242<br>(99.97)  | 21<br>(0.03)   | 1.64 (0.68 - 3.92,<br>p=0.27)             | 0.97 (0.29 - 3.21),<br>p=0.96)            |
|                           | Poorest (%)   | 81,285<br>(99.97)  | 24<br>(0.03)   | <b>3.4 (1.41 - 8.19),<br/>p=0.01</b>      | 2.94 (0.79 - 10.9,<br>p=0.11)             |
|                           | Missing (%)   | 14,143<br>(3.33)   | 0 (0)          | -                                         | -                                         |
| <b>Education</b>          | Tertiary (%)  | 15,4661<br>(99.99) | 14<br>(0.01)   | Ref.                                      | Ref.                                      |
|                           | Secondary (%) | 172,922<br>(99.98) | 32<br>(0.02)   | <b>2.26 (1.1 - 4.65),<br/>p=0.03</b>      | 1.5 (0.58 - 3.87,<br>p=0.4)               |
|                           | Primary (%)   | 76,236<br>(99.96)  | 28<br>(0.04)   | <b>2.42 (1.14 - 5.14),<br/>p=0.02</b>     | 1.18 (0.42 - 3.32,<br>p=0.75)             |
|                           | Missing (%)   | 20,474<br>(4.83)   | 3 (3.9)        |                                           |                                           |
| <b>Country of birth</b>   | Sweden (%)    | 324,716<br>(99.98) | 54<br>(0.02)   | Ref.                                      | Ref.                                      |
|                           | HIC (%)       | 33,372<br>(99.97)  | 11<br>(0.03)   | 1.79 (0.82 - 3.93,<br>p=0.15)             | 1.84 (0.59 - 5.72,<br>p=0.29)             |
|                           | MIC (%)       | 45,124<br>(99.98)  | 10<br>(0.02)   | <b>4.44 (1.73 - 11.4),<br/>p&lt;0.001</b> | 1.68 (0.34 - 8.24,<br>p=0.52)             |
|                           | LIC (%)       | 20,869<br>(99.99)  | 2 (0.01)       | 1.68 (0.3 - 9.41),<br>p=0.56)             | 0.92 (0.08 - 10.5,<br>p=0.94)             |
|                           | Missing (%)   | 212 (0.05)         | 0 (0)          | -                                         | -                                         |

AMI Acute myocardial infarction; CI confidence intervals; wCCI weighted Charlson Comorbidity index; OR Odds Ratio; SD standard deviation; HIC High Income Countries; MIC Middle Income Countries; LIC Low Income Countries



Supplementary Table 7. Unadjusted and adjusted conditional Logistic regression models. Stroke within 14 days following COVID-19 onset. A matched cohort study. Day 0 is included in the study period.

| Variable                  | Categories    | Stroke             |                | Univariable models                    | Multivariable model                   |
|---------------------------|---------------|--------------------|----------------|---------------------------------------|---------------------------------------|
|                           |               | No<br>(n=424,383)  | Yes<br>(n=92)  | OR (95%CI)                            | OR (95%CI)                            |
| <b>COVID-19 diagnosis</b> | No (%)        | 340,916<br>(99.99) | 37<br>(0.01)   | Ref.                                  | Ref.                                  |
|                           | Yes (%)       | 83,467<br>(99.93)  | 55<br>(0.07)   | <b>7.03 (4.47 - 11.0, p&lt;0.001)</b> | <b>6.74 (3.71 - 12.2, p&lt;0.001)</b> |
| <b>WCCI</b>               | mean (SD)     | 1.05 (2.06)        | 4.55<br>(3.50) | <b>1.37 (1.24 - 1.51, p&lt;0.001)</b> | <b>1.37 (1.22 - 1.54, p&lt;0.001)</b> |
| <b>Income (Quintiles)</b> | Richest (%)   | 83,118<br>(99.98)  | 14<br>(0.02)   | Ref.                                  | Ref.                                  |
|                           | Rich (%)      | 83,329<br>(99.99)  | 10<br>(0.01)   | 0.72 (0.29 - 1.8),<br>p=0.48          | 0.61 (0.18 - 2.09,<br>p=0.43)         |
|                           | Middle (%)    | 82,621<br>(99.99)  | 10<br>(0.01)   | 0.86 (0.34 - 2.12,<br>p=0.74)         | 0.59 (0.18 - 2.01,<br>p=0.4)          |
|                           | Poor (%)      | 80,137<br>(99.97)  | 28<br>(0.03)   | 1.53 (0.72 - 3.27,<br>p=0.27)         | 1.28 (0.44 - 3.75,<br>p=0.65)         |
|                           | Poorest (%)   | 81,047<br>(99.96)  | 30<br>(0.04)   | 1.91 (0.91 - 3.98,<br>p=0.08)         | 0.8 (0.27 - 2.41,<br>p=0.69)          |
|                           | Missing (%)   | 14,131<br>(3.33)   | 0 (0)          | -                                     | -                                     |
| <b>Education</b>          | Tertiary (%)  | 154,512<br>(99.98) | 25<br>(0.02)   | Ref.                                  | Ref.                                  |
|                           | Secondary (%) | 173,068<br>(99.98) | 34<br>(0.02)   | 1.04 (0.59 - 1.85,<br>p=0.89)         | 1.02 (0.47 - 2.22,<br>p=0.96)         |
|                           | Primary (%)   | 76,401<br>(99.96)  | 31<br>(0.04)   | 1.35 (0.74 - 2.47,<br>p=0.32)         | 1.22 (0.51 - 2.9,<br>p=0.65)          |
|                           | Missing (%)   | 20,402<br>(4.81)   | 2 (2.17)       | -                                     | -                                     |
| <b>Country of birth</b>   | Sweden (%)    | 324,539<br>(99.98) | 64<br>(0.02)   | Ref.                                  | Ref.                                  |
|                           | HIC (%)       | 33,285<br>(99.96)  | 12<br>(0.04)   | 1.27 (0.6 - 2.67),<br>p=0.53          | 1.04 (0.4 - 2.74,<br>p=0.93)          |
|                           | MIC (%)       | 45,436<br>(99.98)  | 10<br>(0.02)   | 2.34 (1.03 - 5.33,<br>p=0.04)         | 2.2 (0.63 - 7.72,<br>p=0.22)          |
|                           | LIC (%)       | 20,911<br>(99.97)  | 6 (0.03)       | <b>12.97 (2.54 - 66, p&lt;0.001)</b>  | 16 (0.91 - 2.51,<br>p=0.06)           |
|                           | Missing (%)   | 212 (0.05)         | 0 (0)          | -                                     | -                                     |

CI confidence intervals; wCCI weighted Charlson Comorbidity index; OR Odds Ratio; SD standard deviation; HIC High Income Countries; MIC Middle Income Countries; LIC Low Income Countries

Supplementary Figure 1. Distribution of acute myocardial infarction relative to COVID-19 date.

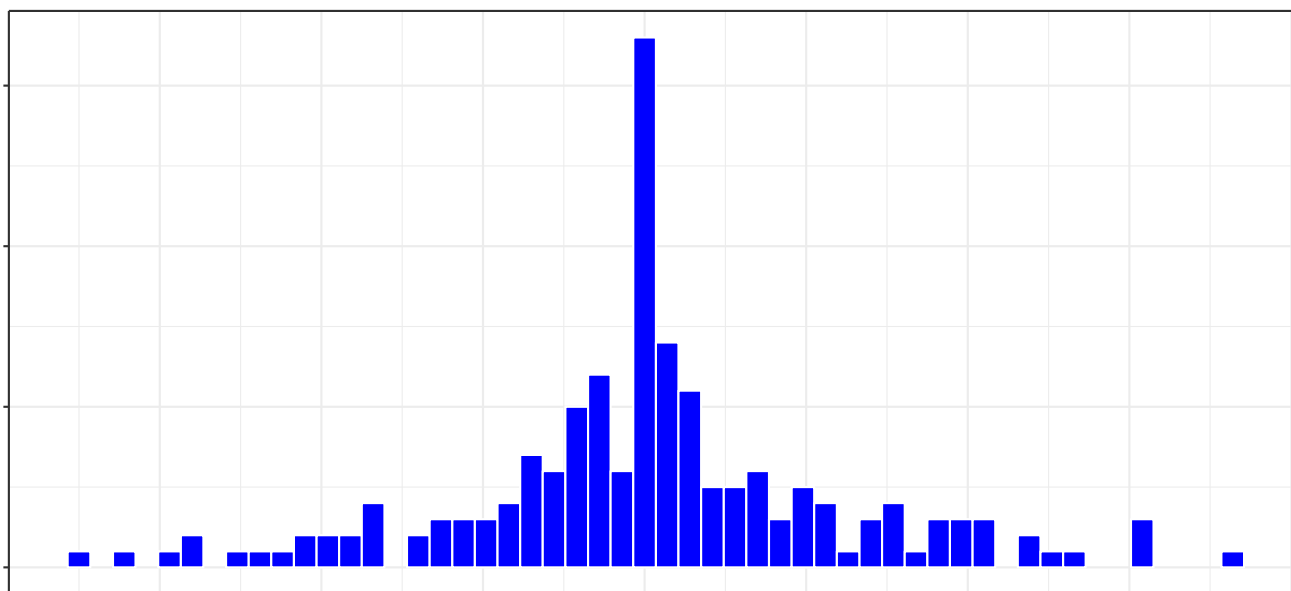

Supplementary Figure 2. Distribution of ischaemic stroke relative to COVID-19 date.

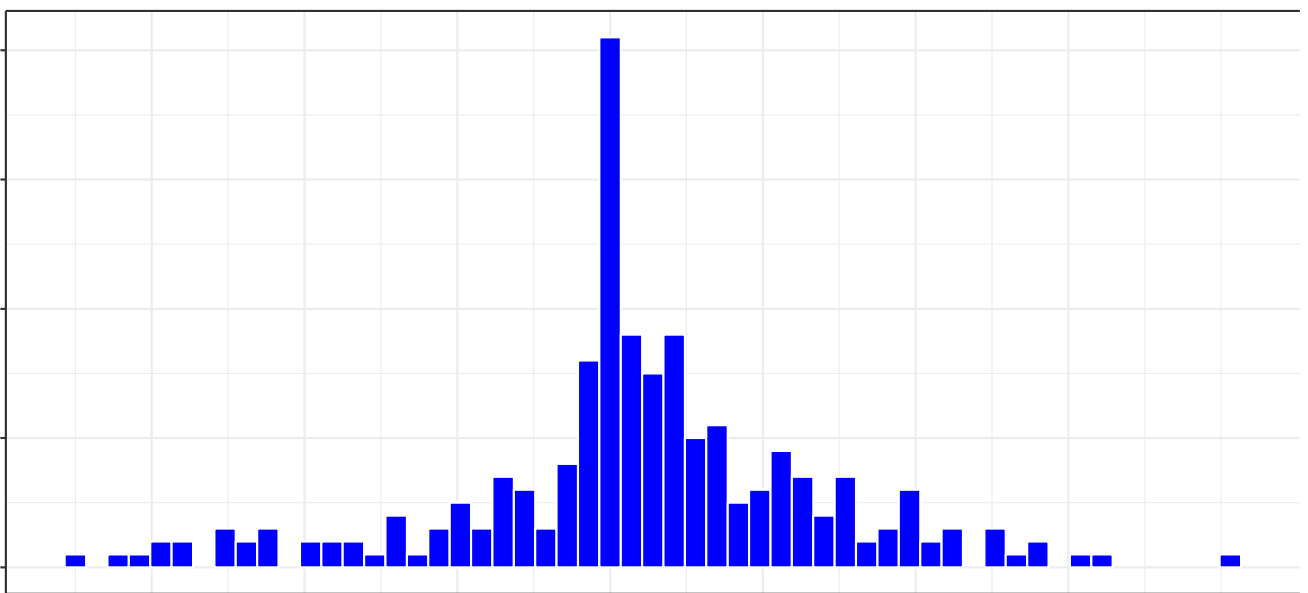

Supplement: mmc1.pdf [file mmc1.pdf]
